# Supplementary material
Source: Springer Nature journal article supplement (https://www.springermedizin.de/resource/supplementary/12888_2010_839_MOESM1_ESM.pdf/9478914)

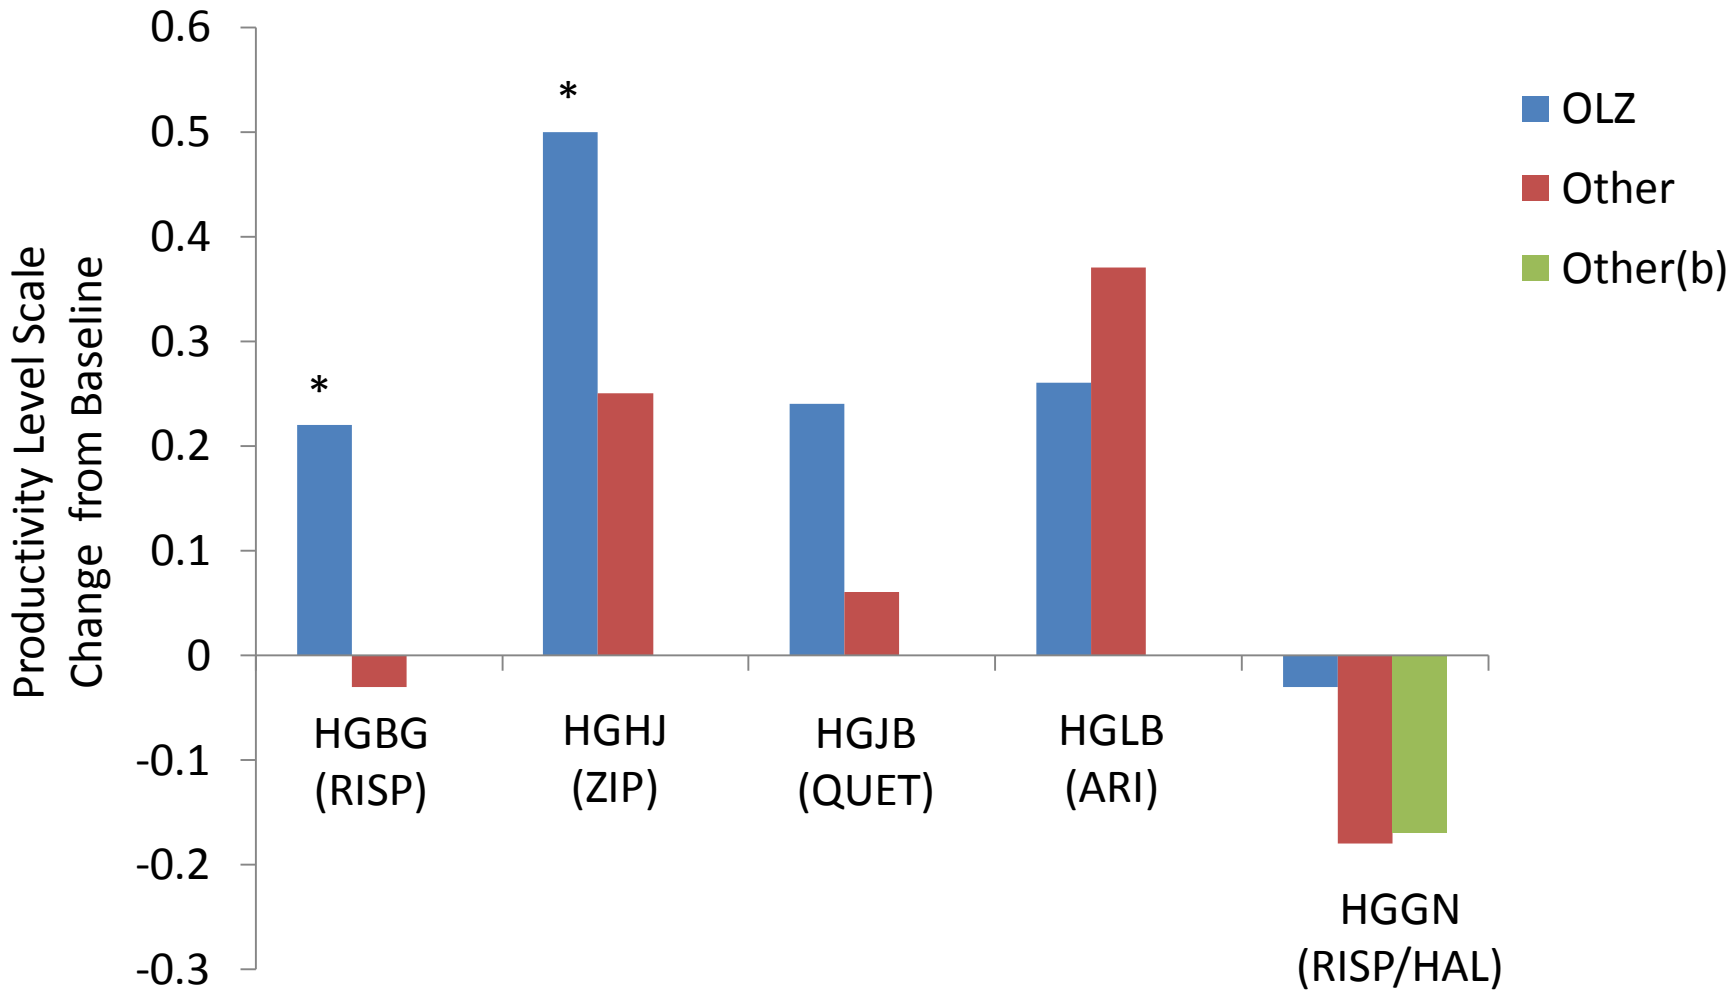

Supplement: MOESM1 [file 9478914]
